# Supplementary material for: Complexity and diversity of eyes in Early Cambrian ecosystems
Source: PubMed Central journal article supplement — Sci Rep. 2013 Sep 25;3:2751. doi: 10.1038/srep02751 (PMC3783037; doi:10.1038/srep02751), 2013-09-25
Supplement: srep02751-s1.pdf [file srep02751-s1.pdf]

# **Supplementary Information**

## **Complexity and diversity of eyes in Early Cambrian ecosystems**

Fangchen Zhao<sup>1,2</sup>, David J. Bottjer<sup>2</sup>, Shixue Hu<sup>3</sup>, Zongjun Yin<sup>1</sup> & Maoyan Zhu<sup>1</sup>

<sup>1</sup>State Key Laboratory of Palaeobiology and Stratigraphy, Nanjing Institute of Geology and Palaeontology, Chinese Academy of Sciences, Nanjing 210008, China,

<sup>2</sup>Department of Earth Sciences, University of Southern California, Los Angeles, California 90089, USA,

<sup>3</sup>Chengdu Institute of Geology and Mineral Resources, Chengdu Center of China Geological Survey, Chengdu 610081, China

**Supplementary Table 1 | Occurrence of eyes in species from Mafang quarry.**

| TAXA                                     | Phylum         | Count | %     | Life habits | Feeding types | Eyes |
|------------------------------------------|----------------|-------|-------|-------------|---------------|------|
| 1 <i>Kunmingella douvillei</i>           | Arthropoda     | 1962  | 19.74 | EV          | HS            | Yes  |
| 2 <i>Cricocosmia jinningensis</i>        | Priapulida     | 1958  | 19.70 | IV          | HS            | No   |
| 3 <i>Diandongia pista</i>                | Brachiopoda    | 1883  | 18.94 | ES          | SU            | No   |
| 4 <i>Leanchoilia illecebrosa</i>         | Arthropoda     | 832   | 8.37  | EV          | HS            | Yes  |
| 5 <i>Mafangsclex sinensis</i>            | Priapulida     | 674   | 6.78  | IV          | HS            | No   |
| 6 <i>Naraoia spinosa</i>                 | Arthropoda     | 436   | 4.39  | EV          | HS            | No   |
| 7 <i>Naraoia longicaudata</i>            | Arthropoda     | 391   | 3.93  | EV          | HS            | No   |
| 8 <i>Heliomedusa orientia</i>            | Brachiopoda    | 282   | 2.84  | ES          | SU            | No   |
| 9 <i>Lingulella chengjiangensis</i>      | Brachiopoda    | 230   | 2.31  | IV          | SU            | No   |
| 10 <i>Eoredlichia intermedia</i>         | Arthropoda     | 178   | 1.79  | EV          | HS            | Yes  |
| 11 <i>Isoxys auritus</i>                 | Arthropoda     | 130   | 1.31  | PE          | HS            | Yes  |
| 12 <i>Stelostomites eumorpha</i>         | Unknown        | 127   | 1.28  | PE          | HS            | No   |
| 13 <i>Burithes yunnanensis</i>           | Mollusca       | 89    | 0.90  | EV          | DE            | No   |
| 14 <i>Waptia ovata</i>                   | Arthropoda     | 85    | 0.86  | NK          | DE            | Yes  |
| 15 <i>Naraoia sp.</i>                    | Arthropoda     | 49    | 0.49  | EV          | HS            | No   |
| 16 <i>Wangyuia yunnanensis</i>           | Brachiopoda    | 43    | 0.43  | IV          | SU            | No   |
| 17 <i>Branchiocaris? Yunnanensis</i>     | Arthropoda     | 42    | 0.42  | NK          | HS            | Yes  |
| 18 <i>Hazelia sp.nov</i>                 | Porifera       | 42    | 0.42  | ES          | SU            | No   |
| 19 <i>Amplectobelua symbrachiata</i>     | Arthropoda     | 41    | 0.41  | NK          | HS            | Yes  |
| 20 <i>Primicaris lavaformis</i>          | Arthropoda     | 39    | 0.39  | EV          | SU            | No   |
| 21 <i>Fuxianhua protensa</i>             | Arthropoda     | 27    | 0.27  | EV          | HS            | Yes  |
| 22 <i>Canadaspis laevigata</i>           | Arthropoda     | 22    | 0.22  | EV          | HS            | Yes  |
| 23 <i>Ercaicunia multinodosa</i>         | Arthropoda     | 21    | 0.21  | EV          | DE            | Yes  |
| 24 <i>Leptomitius teretiusculus</i>      | Porifera       | 21    | 0.21  | ES          | SU            | No   |
| 25 <i>Archotuba conoidalis</i>           | Cnidaria       | 19    | 0.19  | ES          | SU            | No   |
| 26 <i>Yunnanocephalus yunnanensis</i>    | Arthropoda     | 18    | 0.18  | EV          | HS            | Yes  |
| 27 <i>Anomalocaris saron</i>             | Arthropoda     | 17    | 0.17  | NK          | HS            | Yes  |
| 28 <i>Saetaspongia densa</i>             | Porifera       | 16    | 0.16  | ES          | SU            | No   |
| 29 <i>Paraleptomitella dictyodroma</i>   | Porifera       | 15    | 0.15  | ES          | SU            | No   |
| 30 <i>Archisaccophyllia kunmingensis</i> | Cnidaria       | 14    | 0.14  | ES          | SU            | No   |
| 31 <i>Sicyphorus rara</i>                | Priapulida     | 13    | 0.13  | IV          | DE            | No   |
| 32 <i>Paraselkirkia jinningensis</i>     | Priapulida     | 13    | 0.13  | IV          | HS            | No   |
| 33 <i>Lingulellotreta malongensis</i>    | Brachiopoda    | 12    | 0.12  | IV          | SU            | No   |
| 34 <i>Onychodictyon ferox</i>            | Lobopodia      | 11    | 0.11  | EV          | HS            | No   |
| 35 <i>Isoxys paradoxus</i>               | Arthropoda     | 10    | 0.10  | PE          | HS            | Yes  |
| 36 <i>Xiangguangia sinica</i>            | Cnidaria       | 10    | 0.10  | ES          | HS            | No   |
| 37 <i>Luolishania longicuris</i>         | Lobopodia      | 10    | 0.10  | EV          | HS            | Yes  |
| 38 <i>Isoxys curvirostratus</i>          | Arthropoda     | 9     | 0.09  | PE          | HS            | Yes  |
| 39 <i>Allonina phrixothrix</i>           | Chancelloriids | 9     | 0.09  | ES          | SU            | No   |
| 40 <i>Palaeopriapulites parvus</i>       | Priapulida     | 8     | 0.08  | IV          | HS            | No   |
| 41 <i>Vetulicola cuneata</i>             | Vetulicolia    | 8     | 0.08  | NK          | SU            | No   |
| 42 <i>Urokodia aequalis</i>              | Arthropoda     | 7     | 0.07  | EV          | UN            | ?    |
| 43 <i>Cindarella eucalla</i>             | Arthropoda     | 7     | 0.07  | EV          | HS            | Yes  |
| 44 <i>Combinivalvula chengjiangensis</i> | Arthropoda     | 7     | 0.07  | EV          | UN            | Yes  |
| 45 <i>Longtancunella chengjiangensis</i> | Brachiopoda    | 7     | 0.07  | ES          | SU            | No   |
| 46 <i>Leptomitella conica</i>            | Porifera       | 7     | 0.07  | ES          | SU            | No   |
| 47 <i>Retifacies abnormalis</i>          | Arthropoda     | 6     | 0.06  | EV          | HS            | Yes  |
| 48 <i>Xandarella spectaculum</i>         | Arthropoda     | 6     | 0.06  | EV          | HS            | Yes  |
| 49 <i>Haikoucaris ercaiensis</i>         | Arthropoda     | 6     | 0.06  | EV          | HS            | Yes  |
| 50 <i>Paucipodia haikouensis</i>         | Lobopodia      | 6     | 0.06  | EV          | HS            | No   |

|    |                                      |             |   |      |    |    |     |
|----|--------------------------------------|-------------|---|------|----|----|-----|
| 51 | <i>Cardiodictyon catenulum</i>       | Lobopodia   | 6 | 0.06 | EV | HS | No  |
| 52 | <i>Halichondrites elissa</i>         | Porifera    | 6 | 0.06 | ES | SU | No  |
| 53 | <i>Kuamaia lata</i>                  | Arthropoda  | 5 | 0.05 | EV | HS | Yes |
| 54 | <i>Choiarella radiata</i>            | Porifera    | 5 | 0.05 | ES | SU | No  |
| 55 | <i>Microdictyon sinicum</i>          | Lobopodia   | 4 | 0.04 | EV | HS | No  |
| 56 | <i>Pseudoiulia cambriensis</i>       | Arthropoda  | 3 | 0.03 | EV | UN | ?   |
| 57 | <i>Beidazoon venustum</i>            | Vetulicolia | 3 | 0.03 | NK | SU | No  |
| 58 | <i>Fortiforceps foliosa</i>          | Arthropoda  | 2 | 0.02 | EV | HS | Yes |
| 59 | <i>Conicula striata</i>              | Cnidaria    | 2 | 0.02 | ES | UN | No  |
| 60 | <i>Ambrolinevitus platypluteus</i>   | Mollusca    | 2 | 0.02 | EV | DE | No  |
| 61 | <i>Ambrolinevitus ventricosus</i>    | Mollusca    | 2 | 0.02 | EV | DE | No  |
| 62 | <i>Pomatrum ventralis</i>            | Vetulicolia | 2 | 0.02 | NK | SU | No  |
| 63 | <i>Malongella bituberculata</i>      | Arthropoda  | 1 | 0.01 | EV | DE | ?   |
| 64 | <i>Acanthomeridion serratum</i>      | Arthropoda  | 1 | 0.01 | EV | UN | ?   |
| 65 | <i>Dongshanocaris foliiformis</i>    | Arthropoda  | 1 | 0.01 | EV | UN | ?   |
| 66 | <i>Parapaleomerus sinensis</i>       | Arthropoda  | 1 | 0.01 | EV | UN | ?   |
| 67 | <i>Squamacula clypeata</i>           | Arthropoda  | 1 | 0.01 | EV | HS | No  |
| 68 | <i>Chengjiangocaris longiformis</i>  | Arthropoda  | 1 | 0.01 | EV | HS | Yes |
| 69 | <i>Jianfengia multisegmentalis</i>   | Arthropoda  | 1 | 0.01 | EV | HS | Yes |
| 70 | <i>Saperion glumaceum</i>            | Arthropoda  | 1 | 0.01 | EV | HS | Yes |
| 71 | <i>Shankouia zhenghei</i>            | Arthropoda  | 1 | 0.01 | EV | HS | Yes |
| 72 | <i>Kuanyangia pustulosa</i>          | Arthropoda  | 1 | 0.01 | EV | HS | Yes |
| 73 | <i>Parapeytoia yunnanensis</i>       | Arthropoda  | 1 | 0.01 | NK | HS | Yes |
| 74 | <i>Pectocaris spatiosa</i>           | Arthropoda  | 1 | 0.01 | EV | UN | Yes |
| 75 | <i>Hallucigenia fortis</i>           | Lobopodia   | 1 | 0.01 | EV | HS | Yes |
| 76 | <i>Facivermis yunnanicus</i>         | Lobopodia   | 1 | 0.01 | IV | HS | No  |
| 77 | <i>Diania cactiformis</i>            | Lobopodia   | 1 | 0.01 | EV | UN | No  |
| 78 | <i>Petalilium latum</i>              | Mollusca    | 1 | 0.01 | NK | HS | Yes |
| 79 | <i>Paraleptomitella globula</i>      | Porifera    | 1 | 0.01 | ES | SU | No  |
| 80 | <i>Corynetis brevis</i>              | Priapulida  | 1 | 0.01 | IV | HS | No  |
| 81 | <i>Xiaoheiqingella peculiaris</i>    | Priapulida  | 1 | 0.01 | IV | HS | No  |
| 82 | <i>Yunnanpriapulid halteriformis</i> | Priapulida  | 1 | 0.01 | IV | HS | No  |
| 83 | <i>Cotyledion tylodes</i>            | Unknown     | 1 | 0.01 | ES | SU | No  |
| 84 | <i>Dinomischus isolatus</i>          | Unknown     | 1 | 0.01 | ES | SU | No  |
| 85 | <i>Phlogites longus</i>              | Unknown     | 1 | 0.01 | ES | SU | No  |
| 86 | <i>Heteromorphus confusa</i>         | Vetulicolia | 1 | 0.01 | NK | SU | No  |

Counts are actual number of specimens. Total count = 9941. Hypotheses of mode of life for these species are based on published documents, interpretations of preserved morphological and anatomical features such as the presence of preserved feeding apparatus or limbs, and the presence of gut contents. Abbreviations: Life habits: IS, Infaunal sessile; IV, Infaunal vagrant; ES, Epifaunal sessile; EV, Epifaunal vagrant; NK, Nektonic; PE, Pelagic; UN, Unknown. Feeding types: SU, Suspension; DE, Deposit; HS, Hunter/Scavenger.

**Supplementary Table 2** | Percentage of species and specimens with eyes in the Mafang quarry, related to life habit, feeding types, and phylum respectively.

|                   | Species              |                             |        | Individuals |                                 |        |
|-------------------|----------------------|-----------------------------|--------|-------------|---------------------------------|--------|
|                   | Total                | Number of species with eyes | % Eyes | Total       | Number of individuals with eyes | % Eyes |
|                   | <i>Phylum</i>        |                             |        |             |                                 |        |
| Arthropoda        | 39                   | 28                          | 71.8   | 4370        | 3440                            | 78.7   |
| Lobopodia         | 8                    | 2                           | 25.0   | 40          | 11                              | 27.5   |
| Mollusca          | 4                    | 1                           | 25.0   | 94          | 1                               | 1.1    |
| Priapulida        | 8                    | 0                           | 0.0    | 2669        | 0                               | 0.0    |
| Porifera          | 8                    | 0                           | 0.0    | 113         | 0                               | 0.0    |
| Brachiopoda       | 6                    | 0                           | 0.0    | 2457        | 0                               | 0.0    |
| Unknown           | 4                    | 0                           | 0.0    | 130         | 0                               | 0.0    |
| Vetulicolia       | 4                    | 0                           | 0.0    | 14          | 0                               | 0.0    |
| Cnidaria          | 4                    | 0                           | 0.0    | 45          | 0                               | 0.0    |
| Chancelloriids    | 1                    | 0                           | 0.0    | 9           | 0                               | 0.0    |
|                   | <i>Life habit</i>    |                             |        |             |                                 |        |
| Pelagic           | 4                    | 3                           | 75.0   | 276         | 149                             | 54.0   |
| Nektonic          | 10                   | 6                           | 60.0   | 201         | 187                             | 93.0   |
| Epifaunal vagrant | 41                   | 22                          | 53.7   | 4167        | 3116                            | 74.8   |
| Epifaunal sessile | 19                   | 0                           | 0.0    | 2342        | 0                               | 0.0    |
| Infaunal          | 12                   | 0                           | 0.0    | 2955        | 0                               | 0.0    |
|                   | <i>Feeding types</i> |                             |        |             |                                 |        |
| Hunter/Scavenger  | 45                   | 27                          | 60.0   | 7036        | 3338                            | 47.4   |
| Deposit           | 7                    | 2                           | 28.6   | 213         | 106                             | 49.8   |
| Suspension        | 25                   | 0                           | 0.0    | 2668        | 0                               | 0.0    |
| Unknown           | 9                    | 2                           | 22.2   | 24          | 8                               | 33.3   |

**Supplementary Table 3** | Proportional distribution of species and individuals with eyes, related to life habit, feeding types, and phylum respectively.

|                   | Species |      | Individuals          |      |
|-------------------|---------|------|----------------------|------|
|                   | Count   | %    | Count                | %    |
|                   |         |      | <i>Phylum</i>        |      |
| Arthropoda        | 28      | 90.3 | 3440                 | 99.7 |
| Lobopodia         | 2       | 6.5  | 11                   | 0.3  |
| Mollusca          | 1       | 3.2  | 1                    | 0.03 |
|                   |         |      | <i>Life habit</i>    |      |
| Epifaunal vagrant | 22      | 71.0 | 3116                 | 90.3 |
| Nektonic          | 6       | 19.4 | 187                  | 5.4  |
| Pelagic           | 3       | 9.7  | 149                  | 4.3  |
|                   |         |      | <i>Feeding types</i> |      |
| Hunter/Scavenger  | 27      | 87.1 | 3338                 | 96.7 |
| Deposit           | 2       | 6.5  | 106                  | 3.1  |
| Unknown           | 2       | 6.5  | 8                    | 0.2  |
